# Supplementary material for: Soluble Epoxide Hydrolase Hepatic Deficiency Ameliorates Alcohol-Associated Liver Disease
Source: PubMed Central journal article supplement — Cell Mol Gastroenterol Hepatol. 2020 Oct 15;11(3):815–30. doi: 10.1016/j.jcmgh.2020.10.002 (PMC7851189; doi:10.1016/j.jcmgh.2020.10.002), 2020-10-15
Supplement: mmc1.pdf [file mmc1.pdf]

**Supplementary Table 1: The hepatic oxylipin levels (nM/g) in *Ephx2<sup>fl/fl</sup>* and *Alb-Cre; Ephx2<sup>fl/fl</sup>* mice under pair-and ethanol (EtOH)-fed states.**

| Group                                        | 6-keto-PGF1a | 9,12,13-TriHOME | 9,10,13-TriHOME | PGF2a | PGE2 | PGD2 | LXA4 | THF diol | 15,16-DIHOME | 8,15-DIHETE | 9,10-DIHOME | 12,13-DIHOME | 17,18-DIHETE | 14,15-DIHETE | 11,12-DIHETE | 12,13-DIHOME | 8,9-DIHETE | 9,10-DIHOME | 19,20-DIHOME | 14,15-DIHETE | LTB3 |
|----------------------------------------------|--------------|-----------------|-----------------|-------|------|------|------|----------|--------------|-------------|-------------|--------------|--------------|--------------|--------------|--------------|------------|-------------|--------------|--------------|------|
| <i>Ephx2<sup>fl/fl</sup></i> -Pair_1         | 58.8         | 23.3            | 13.1            | 23.2  | 5.4  | 8.4  | 0.7  | 0.3      | 10.1         | 0.9         | 1.6         | 1.3          | 17.4         | 9.8          | 3.0          | 115.3        | 2.2        | 62.1        | 166.4        | 90.8         | 0.8  |
| <i>Ephx2<sup>fl/fl</sup></i> -Pair_2         | 79.9         | 306.9           | 114.7           | 13.2  | 3.0  | 8.5  | 1.2  | 0.2      | 11.8         | 4.3         | 2.3         | 1.8          | 22.8         | 13.7         | 5.0          | 185.7        | 4.0        | 105.2       | 245.1        | 163.0        | 1.3  |
| <i>Ephx2<sup>fl/fl</sup></i> -Pair_3         | 103.7        | 548.5           | 352.6           | 22.4  | 4.2  | 18.1 | 1.6  | 0.4      | 13.8         | 1.7         | 1.5         | 21.5         | 12.1         | 5.1          | 136.4        | 3.1          | 63.4       | 165.8       | 89.0         | 1.6          |      |
| <i>Ephx2<sup>fl/fl</sup></i> -Pair_4         | 113.7        | 64.1            | 40.7            | 17.6  | 3.9  | 13.1 | 0.9  | 0.2      | 15.8         | 1.2         | 1.7         | 1.5          | 25.4         | 12.2         | 4.2          | 206.5        | 2.7        | 76.2        | 244.4        | 115.8        | 1.3  |
| <i>Ephx2<sup>fl/fl</sup></i> -Pair_5         | 59.7         | 51.3            | 22.3            | 20.3  | 1.8  | 11.5 | 0.8  | 0.3      | 20.7         | 2.2         | 3.0         | 2.2          | 28.0         | 16.3         | 5.4          | 221.9        | 4.1        | 98.0        | 258.3        | 131.1        | 1.0  |
| <i>Ephx2<sup>fl/fl</sup></i> -Pair_6         | 74.8         | 109.6           | 52.7            | 21.2  | 2.2  | 12.8 | 1.0  | 0.7      | 27.7         | 1.9         | 4.4         | 2.9          | 28.6         | 15.7         | 5.7          | 271.3        | 4.2        | 116.7       | 271.7        | 117.7        | 0.8  |
| <i>Ephx2<sup>fl/fl</sup></i> -Pair_7         | 158.1        | 108.2           | 38.7            | 37.3  | 3.4  | 13.8 | 1.1  | 0.3      | 7.9          | 3.0         | 1.1         | 1.5          | 22.1         | 11.1         | 3.5          | 207.5        | 1.8        | 78.5        | 224.1        | 143.6        | 1.3  |
| <i>Ephx2<sup>fl/fl</sup></i> -Pair_8         | 132.4        | 124.3           | 56.4            | 22.6  | 3.7  | 11.4 | 1.1  | 0.3      | 18.4         | 1.1         | 1.4         | 1.9          | 19.6         | 9.7          | 3.2          | 154.9        | 2.2        | 46.4        | 167.6        | 86.0         | 0.8  |
| <i>Alb-Cre;Ephx2<sup>fl/fl</sup></i> -Pair_1 | 69.3         | 180.8           | 105.4           | 11.1  | 1.2  | 5.6  | 1.3  | 0.3      | 4.5          | 6.8         | 0.9         | 1.0          | 23.4         | 8.9          | 3.0          | 77.3         | 1.5        | 44.4        | 189.3        | 57.8         | 0.7  |
| <i>Alb-Cre;Ephx2<sup>fl/fl</sup></i> -Pair_2 | 94.7         | 42.9            | 28.2            | 21.4  | 2.6  | 17.5 | 1.1  | 0.2      | 3.1          | 1.4         | 1.2         | 0.7          | 25.7         | 11.6         | 4.0          | 71.8         | 2.4        | 44.5        | 224.5        | 66.9         | 0.4  |
| <i>Alb-Cre;Ephx2<sup>fl/fl</sup></i> -Pair_3 | 78.8         | 86.2            | 56.8            | 15.1  | 2.5  | 10.6 | 1.0  | 0.2      | 3.4          | 1.7         | 1.5         | 1.0          | 19.3         | 7.0          | 3.0          | 80.7         | 1.3        | 53.9        | 236.8        | 84.9         | 1.0  |
| <i>Alb-Cre;Ephx2<sup>fl/fl</sup></i> -Pair_4 | 83.9         | 138.6           | 88.5            | 14.4  | 2.1  | 12.0 | 1.2  | 0.2      | 3.6          | 2.1         | 1.6         | 1.1          | 25.7         | 9.6          | 4.3          | 86.6         | 2.2        | 58.8        | 238.2        | 79.4         | 0.9  |
| <i>Alb-Cre;Ephx2<sup>fl/fl</sup></i> -Pair_5 | 69.7         | 102.4           | 66.0            | 17.9  | 1.3  | 9.6  | 0.8  | 0.3      | 7.4          | 1.2         | 1.5         | 1.6          | 24.7         | 10.9         | 3.8          | 148.7        | 2.3        | 46.3        | 218.0        | 75.0         | 0.8  |
| <i>Alb-Cre;Ephx2<sup>fl/fl</sup></i> -Pair_6 | 144.2        | 107.7           | 58.6            | 22.5  | 2.2  | 6.8  | 1.2  | 0.4      | 4.5          | 3.6         | 0.9         | 1.3          | 22.5         | 10.2         | 3.8          | 127.7        | 2.3        | 42.9        | 172.5        | 95.1         | 0.8  |
| <i>Alb-Cre;Ephx2<sup>fl/fl</sup></i> -Pair_7 | 81.7         | 94.0            | 63.5            | 15.8  | 2.3  | 6.5  | 1.4  | 0.3      | 8.4          | 1.4         | 1.5         | 2.1          | 27.0         | 19.9         | 5.9          | 108.7        | 3.0        | 44.5        | 223.9        | 78.7         | 0.8  |
| <i>Alb-Cre;Ephx2<sup>fl/fl</sup></i> -Pair_8 | 166.8        | 89.2            | 55.4            | 33.5  | 3.2  | 25.5 | 1.2  | 0.9      | 7.3          | 2.0         | 1.9         | 1.8          | 19.9         | 10.3         | 3.4          | 132.5        | 2.1        | 62.4        | 208.1        | 94.2         | 1.1  |
| <i>Ephx2<sup>fl/fl</sup></i> -EtOH_1         | 62.3         | 84.9            | 40.8            | 32.0  | 2.4  | 9.5  | 0.8  | 0.3      | 8.1          | 2.0         | 2.1         | 1.3          | 18.1         | 11.0         | 4.0          | 93.1         | 2.7        | 67.0        | 196.2        | 97.7         | 0.9  |
| <i>Ephx2<sup>fl/fl</sup></i> -EtOH_2         | 55.6         | 65.5            | 31.4            | 18.6  | 3.2  | 11.2 | 0.5  | 0.4      | 9.3          | 2.9         | 2.1         | 1.2          | 17.1         | 8.8          | 3.9          | 96.1         | 2.5        | 70.2        | 214.8        | 96.9         | 0.9  |
| <i>Ephx2<sup>fl/fl</sup></i> -EtOH_3         | 109.1        | 120.7           | 61.1            | 23.8  | 2.4  | 9.1  | 0.6  | 0.2      | 9.9          | 2.4         | 5.3         | 2.4          | 16.1         | 11.2         | 3.8          | 135.1        | 3.0        | 112.0       | 189.9        | 87.5         | 0.9  |
| <i>Ephx2<sup>fl/fl</sup></i> -EtOH_4         | 40.0         | 97.6            | 54.0            | 31.7  | 4.4  | 12.8 | 0.8  | 0.2      | 18.3         | 0.8         | 3.4         | 1.8          | 32.7         | 21.1         | 6.9          | 86.7         | 5.6        | 66.5        | 241.8        | 65.6         | 0.7  |
| <i>Ephx2<sup>fl/fl</sup></i> -EtOH_5         | 129.1        | 107.8           | 54.5            | 29.0  | 2.8  | 7.8  | 1.1  | 0.3      | 8.6          | 2.7         | 2.5         | 1.1          | 12.4         | 7.3          | 3.3          | 65.9         | 2.7        | 65.3        | 135.4        | 65.6         | 0.6  |
| <i>Ephx2<sup>fl/fl</sup></i> -EtOH_6         | 104.3        | 72.6            | 38.6            | 42.3  | 3.4  | 16.5 | 1.0  | 0.9      | 24.8         | 6.1         | 12.3        | 4.7          | 47.8         | 29.0         | 11.3         | 261.8        | 9.7        | 251.8       | 151.5        | 92.0         | 0.3  |
| <i>Ephx2<sup>fl/fl</sup></i> -EtOH_7         | 216.6        | 74.2            | 32.1            | 8.8   | 5.1  | 10.9 | 0.8  | 0.7      | 56.0         | 6.8         | 13.8        | 9.9          | 93.6         | 52.4         | 18.2         | 591.2        | 7.3        | 127.5       | 361.7        | 137.4        | 0.4  |
| <i>Ephx2<sup>fl/fl</sup></i> -EtOH_8         | 158.1        | 119.6           | 57.3            | 34.5  | 2.5  | 13.1 | 1.1  | 0.4      | 16.6         | 3.1         | 4.4         | 2.8          | 31.2         | 15.3         | 4.5          | 190.5        | 3.7        | 118.2       | 268.8        | 118.6        | 1.4  |
| <i>Alb-Cre;Ephx2<sup>fl/fl</sup></i> -EtOH_1 | 197.6        | 249.0           | 121.6           | 25.1  | 5.8  | 16.7 | 4.3  | 0.6      | 23.8         | 5.2         | 14.1        | 20.0         | 23.9         | 21.3         | 8.5          | 174.2        | 10.9       | 150.0       | 258.5        | 80.1         | 2.3  |
| <i>Alb-Cre;Ephx2<sup>fl/fl</sup></i> -EtOH_2 | 63.5         | 132.9           | 75.5            | 15.0  | 2.4  | 5.8  | 1.1  | 0.4      | 2.6          | 3.8         | 1.4         | 0.5          | 21.3         | 5.3          | 4.6          | 47.2         | 3.6        | 39.9        | 94.2         | 32.1         | 0.3  |
| <i>Alb-Cre;Ephx2<sup>fl/fl</sup></i> -EtOH_3 | 123.0        | 57.6            | 34.5            | 32.4  | 2.3  | 13.0 | 1.0  | 0.5      | 12.0         | 2.9         | 4.1         | 2.4          | 46.8         | 9.4          | 3.3          | 107.9        | 4.8        | 87.8        | 242.6        | 60.5         | 0.5  |
| <i>Alb-Cre;Ephx2<sup>fl/fl</sup></i> -EtOH_4 | 53.4         | 38.8            | 26.1            | 13.4  | 0.9  | 5.4  | 0.6  | 0.3      | 3.8          | 1.0         | 2.0         | 0.8          | 26.0         | 9.1          | 3.5          | 40.9         | 2.1        | 44.8        | 113.0        | 25.1         | 0.4  |
| <i>Alb-Cre;Ephx2<sup>fl/fl</sup></i> -EtOH_5 | 106.1        | 92.1            | 58.3            | 14.3  | 1.4  | 7.2  | 0.7  | 0.2      | 3.1          | 1.9         | 2.7         | 0.9          | 14.6         | 12.5         | 4.5          | 38.8         | 4.7        | 50.5        | 96.5         | 25.8         | 0.4  |
| <i>Alb-Cre;Ephx2<sup>fl/fl</sup></i> -EtOH_6 | 98.4         | 39.1            | 24.0            | 17.9  | 1.8  | 9.9  | 0.6  | 0.4      | 12.1         | 3.3         | 3.5         | 2.4          | 29.8         | 15.6         | 5.8          | 134.0        | 2.2        | 44.9        | 214.2        | 61.8         | 0.6  |
| <i>Alb-Cre;Ephx2<sup>fl/fl</sup></i> -EtOH_7 | 54.7         | 74.4            | 48.2            | 18.5  | 1.9  | 8.7  | 0.7  | 0.3      | 5.3          | 0.9         | 1.8         | 1.2          | 16.7         | 17.9         | 4.4          | 52.9         | 5.9        | 36.5        | 95.8         | 23.2         | 0.3  |

(continued)

| Group                                        | 16,17-DIHOME | 11,12-DIHETE | 13,14-DIHOME | 9-HETE | 10,11-DIHOME | 8,9-DIHETE | 8-KODE | 13-HETE | 15-deoxy PGJ2 | 7,8-DIHOME | 20-HETE | 15-HEPE | 5,6-DIHEPE | 5-HEPE | 4,5-DIHOME | 13-HODE | 9-HODE | 15(16) ePOME | 15-HETE | 9(10) ePOME | 17(18) ePETE |      |
|----------------------------------------------|--------------|--------------|--------------|--------|--------------|------------|--------|---------|---------------|------------|---------|---------|------------|--------|------------|---------|--------|--------------|---------|-------------|--------------|------|
| <i>Ephx2<sup>fl/fl</sup></i> -Pair_1         | 54.3         | 57.5         | 28.2         | 3.3    | 19.0         | 31.8       | 18.1   | 11.5    | 14.6          | 7.4        | 3.0     | 3.4     | 5.4        | 2.8    | 30.0       | 246.5   | 177.9  | 4.0          | 71.2    | 1.5         | 1.7          |      |
| <i>Ephx2<sup>fl/fl</sup></i> -Pair_2         | 79.9         | 99.8         | 42.6         | 4.3    | 32.4         | 61.1       | 18.0   | 5.2     | 33.6          | 9.9        | 3.8     | 4.3     | 6.9        | 5.1    | 33.5       | 328.3   | 260.7  | 5.4          | 251.2   | 1.5         | 2.1          |      |
| <i>Ephx2<sup>fl/fl</sup></i> -Pair_3         | 57.2         | 53.9         | 32.4         | 3.4    | 22.3         | 28.9       | 7.3    | 4.1     | 25.9          | 5.4        | 3.1     | 6.7     | 2.4        | 4.2    | 23.2       | 232.7   | 239.4  | 4.5          | 117.0   | 0.5         | 1.0          |      |
| <i>Ephx2<sup>fl/fl</sup></i> -Pair_4         | 67.2         | 56.7         | 29.0         | 4.6    | 18.9         | 37.2       | 14.1   | 9.0     | 24.4          | 7.5        | 4.0     | 10.7    | 4.4        | 4.5    | 14.5       | 243.9   | 217.8  | 4.7          | 117.4   | 0.9         | 1.1          |      |
| <i>Ephx2<sup>fl/fl</sup></i> -Pair_5         | 65.8         | 61.2         | 36.9         | 4.8    | 18.6         | 34.5       | 16.6   | 13.3    | 48.7          | 7.0        | 4.3     | 6.7     | 5.2        | 4.2    | 32.4       | 302.1   | 256.2  | 5.5          | 105.0   | 1.1         | 1.6          |      |
| <i>Ephx2<sup>fl/fl</sup></i> -Pair_6         | 70.3         | 56.2         | 29.2         | 4.5    | 20.4         | 37.0       | 17.6   | 11.9    | 46.4          | 7.1        | 5.8     | 7.8     | 5.2        | 4.0    | 47.6       | 406.5   | 335.0  | 304.0        | 14.8    | 133.3       | 6.4          | 6.1  |
| <i>Ephx2<sup>fl/fl</sup></i> -Pair_7         | 73.1         | 79.5         | 34.1         | 2.7    | 20.3         | 40.9       | 11.8   | 20.1    | 34.8          | 6.3        | 5.5     | 10.9    | 4.7        | 2.0    | 23.4       | 445.7   | 298.8  | 4.6          | 209.1   | 1.3         | 1.9          |      |
| <i>Ephx2<sup>fl/fl</sup></i> -Pair_8         | 51.2         | 47.8         | 22.9         | 3.2    | 16.0         | 27.1       | 12.6   | 12.6    | 24.2          | 5.6        | 13.1    | 6.2     | 3.7        | 2.4    | 24.8       | 311.7   | 271.4  | 6.7          | 91.1    | 2.1         | 1.7          |      |
| <i>Alb-Cre;Ephx2<sup>fl/fl</sup></i> -Pair_1 | 77.9         | 50.8         | 41.8         | 2.3    | 15.8         | 13.7       | 9.6    | 16.1    | 37.4          | 2.3        | 3.7     | 8.9     | 1.8        | 2.1    | 49.8       | 592.5   | 335.5  | 17.4         | 231.8   | 1.3         | 6.7          |      |
| <i>Alb-Cre;Ephx2<sup>fl/fl</sup></i> -Pair_2 | 60.9         | 34.3         | 24.8         | 1.4    | 13.2         | 16.2       | 6.5    | 3.6     | 28.3          | 3.3        | 4.0     | 6.8     | 1.3        | 3.2    | 73.6       | 210.7   | 185.5  | 7.6          | 109.3   | 0.7         | 7.9          |      |
| <i>Alb-Cre;Ephx2<sup>fl/fl</sup></i> -Pair_3 | 61.9         | 42.5         | 28.8         | 2.0    | 15.8         | 15.0       | 6.1    | 3.6     | 16.9          | 1.7        | 7.4     | 2.0     | 1.3        | 2.4    | 39.9       | 205.1   | 194.0  | 12.5         | 113.2   | 0.9         | 5.1          |      |
| <i>Alb-Cre;Ephx2<sup>fl/fl</sup></i> -Pair_4 | 63.1         | 43.7         | 30.3         | 2.5    | 20.0         | 16.2       | 8.6    | 4.3     | 16.3          | 3.0        | 11.2    | 4.3     | 1.7        | 5.4    | 75.3       | 249.1   | 212.0  | 16.4         | 153.0   | 1.0         | 11.5         |      |
| <i>Alb-Cre;Ephx2<sup>fl/fl</sup></i> -Pair_5 | 66.8         | 38.5         | 26.2         | 1.9    | 11.7         | 10.5       | 7.3    | 2.2     | 13.3          | 2.3        | 2.7     | 3.3     | 1.2        | 1.2    | 40.0       | 475.2   | 227.0  | 207.4        | 21.1    | 139.1       | 1.4          | 6.4  |
| <i>Alb-Cre;Ephx2<sup>fl/fl</sup></i> -Pair_6 | 56.5         | 37.0         | 21.6         | 1.6    | 12.1         | 10.4       | 6.0    | 8.6     | 26.7          | 2.0        | 5.5     | 7.0     | 1.6        | 2.9    | 34.4       | 421.2   | 289.7  | 12.6         | 207.1   | 0.9         | 5.8          |      |
| <i>Alb-Cre;Ephx2<sup>fl/fl</sup></i> -Pair_7 | 91.0         | 36.6         | 38.4         | 3.1    | 25.9         | 13.0       | 10.5   | 2.6     | 2.6           | 13.9       | 2.9     | 4.2     | 6.0        | 1.5    | 8.4        | 684.0   | 306.0  | 274.5        | 28.2    | 128.8       | 1.7          | 13.8 |
| <i>Alb-Cre;Ephx2<sup>fl/fl</sup></i> -Pair_8 | 72.8         | 44.9         | 33.7         | 3.6    | 25.4         | 15.7       | 12.2   | 7.1     | 7.4           | 6.4        | 2.3     | 6.7     | 8.0        | 1.7    | 3.5        | 50.3    | 427.1  | 385.8        | 24.9    | 172.8       | 2.2          | 7.4  |
| <i>Ephx2<sup>fl/fl</sup></i> -EtOH_1         | 85.4         | 47.3         | 51.3         | 2.7    | 34.0         | 23.6       | 8.5    | 8.6     | 10.1          | 5.3        | 8.2     | 6.2     | 3.9        | 5.5    | 55.2       | 243.8   | 195.0  | 6.5          | 126.3   | 3.0         | 3.9          |      |
| <i>Ephx2<sup>fl/fl</sup></i> -EtOH_2         | 75.6         | 48.6         | 45.3         | 2.2    | 14.2         | 12.8       | 3.9    | 2.6     | 12.0          | 3.6        | 5.8     | 4.2     | 1.6        | 4.5    | 47.6       | 222.0   | 216.7  | 4.2          | 148.0   | 1.7         | 1.6          |      |
| <i>Ephx2<sup>fl/fl</sup></i> -EtOH_3         | 57.0         | 39.6         | 26.5         | 5.1    | 21.1         | 25.8       | 8.4    | 8.4     | 8.5           | 14.0       | 7.3     | 8.4     | 4.6        | 3.7    | 2.1        | 61.9    | 363.8  | 344.5        | 4.4     | 115.8       | 1.3          | 1.1  |
| <i>Ephx2<sup>fl/fl</sup></i> -EtOH_4         | 72.1         | 21.8         | 23.3         | 2.4    | 18.2         | 9.5        | 4.3    | 2.8     | 7.8           | 7.0        | 3.7     | 6.5     | 2.7        | 5.4    | 74.8       | 220.5   | 228.7  | 11.0         | 74.3    | 4.5         | 7.9          |      |
| <i>Ephx2<sup>fl/fl</sup></i> -EtOH_5         | 51.2         | 37.5         | 38.8         | 4.5    | 28.3         | 19.0       | 9.0    | 7.6     | 17.2          | 6.2        | 15.7    | 5.0     | 3.9        | 2.8    | 56.5       | 303.6   | 239.9  | 11.7         | 81.9    | 6.0         | 5.8          |      |
| <i>Ephx2<sup>fl/fl</sup></i> -EtOH_6         | 66.7         | 85.9         | 47.8         | 3.7    | 58.5         | 42.0       | 10.8   | 4.8     | 6.2           | 10.2       | 14.2    | 3.3     | 7.7        | 3.3    | 100.1      | 306.4   | 298.2  | 12.5         | 123.0   | 6.7         | 5.6          |      |
| <i>Ephx2<sup>fl/fl</sup></i> -EtOH_7         | 89.0         | 33.5         | 27.4         | 2.1    | 19.8         | 17.0       | 5.4    | 5.2     | 4.1           | 5.5        | 27.4    | 4.8     | 3.0        | 8.6    | 115.9      | 454.8   | 265.9  | 8.0          | 89.0    | 2.6         | 2.4          |      |
| <i>Ephx2<sup>fl/fl</sup></i> -EtOH_8         | 36.5         | 21.2         | 13.6         | 1.9    |              |            |        |         |               |            |         |         |            |        |            |         |        |              |         |             |              |      |
